# Supplementary material for: Genomic analysis of lncRNA and mRNA profiles in circulating exosomes of patients with rheumatic heart disease
Source: PubMed Central journal article supplement (PMC6918777; doi:10.1242/bio.045633), 2019-12-11
Supplement: biolopen-8-045633-s1.pdf [file biolopen-8-045633-s1.pdf]

Table S1: Demographic data of RHD patients and healthy control.

|                         | RHD group | healthy control | P value |
|-------------------------|-----------|-----------------|---------|
| Age (years)             | 52.6±4.8  | 53.2±4.6        | >0.05   |
| Weight (kg)             | 66.3±12.9 | 68.3±13.2       | >0.05   |
| Sex (female/male)       | 3/2       | 3/2             | >0.05   |
| Smoker (n)              | 0         | 0               | >0.05   |
| Drinker (n)             | 0         | 0               | >0.05   |
| History of diseases (n) | 0         | 0               | >0.05   |
| Family diseases (n)     | 0         | 0               | >0.05   |
| NYHA class (n/class)    | 5/ II     | 5/I             | <0.01   |
| LVEF (%)                | 55.4±5.3  | 64.4±6.8        | <0.01   |

RHD: rheumatic heart disease; NYHA: New York Heart Association class ; EF: left ventricular ejection fraction

**Table S2.** Primers for selected lncRNAs.

| Gene symbol        | Primer sequence                                                  |
|--------------------|------------------------------------------------------------------|
| G002048            | F:5' GTGGCCGAGGACTTTGATTG3'<br>R:5' CCTGTAACAACGCATCTCATATT3'    |
| LINC01535          | F:5' AAGCATGTCTTTCAGAGCCC 3'<br>R:5' CGAGATCATCCAAATCCCTA 3'     |
| G029299            | F:5' ATGAGACACCTGGGAAGAGTG 3'<br>R:5' TGAGGGGACGTGAATTTGG 3'     |
| RP11-218M11.6      | F:5' TAAAAGAAGCAACGACACTCCC 3'<br>R:5' GCACAACACAAACCAAAGCC 3'   |
| ASB9P1             | F:5' TCATCTAATTCAGCCCTCACAG 3'<br>R:5' ATCCTTGCCCTGGGAAATT 3'    |
| G000678            | F:5' GGGTTCAGGTTGTTGTATTGTC 3'<br>R:5' GATTTGTTGTTCTGGTGGAGG 3'  |
| G064270            | F:5' CCCAGGATGTCCACAAAGAA 3'<br>R:5' GCTCATAACCGTGAAGGCT 3'      |
| G078882            | F:5' TAACTTGCCTCAGTCTCTCCCT 3'<br>R:5' ACTCACAGCAACTTCAGTCCTT 3' |
| G030563            | F:5' CCAAATGTCCCCAGAGTGAC 3'<br>R:5' TGAGGTGTTTCGCTCGCTTT 3'     |
| $\beta$ -actin (H) | F:5' GTGGCCGAGGACTTTGATTG3'<br>R:5' CCTGTAACAACGCATCTCATATT3'    |

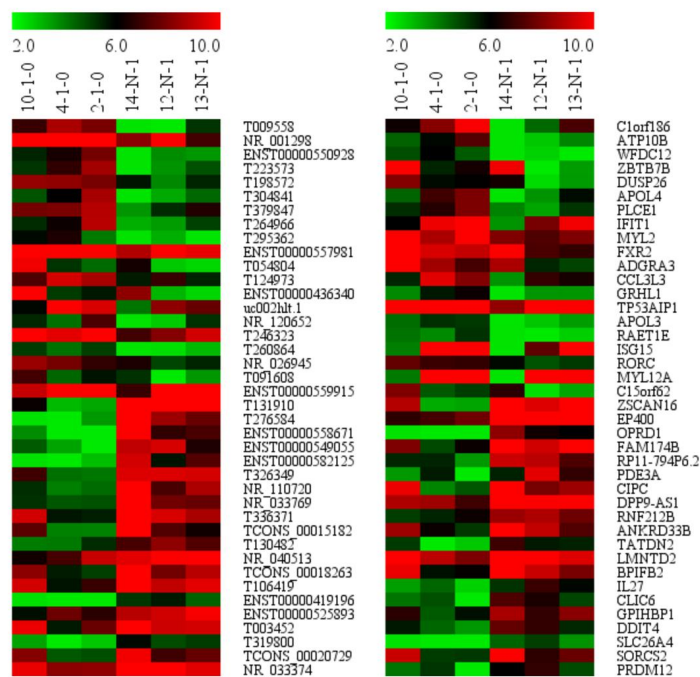

**Figure S1.** Heatmaps of differentially expressed lncRNAs (left) and mRNAs (right). 10-1-0, 4-1-0 and 2-1-0 were sample number from RHD group while 14-N-1, 12-N-1 and 13-N-1 from control group.

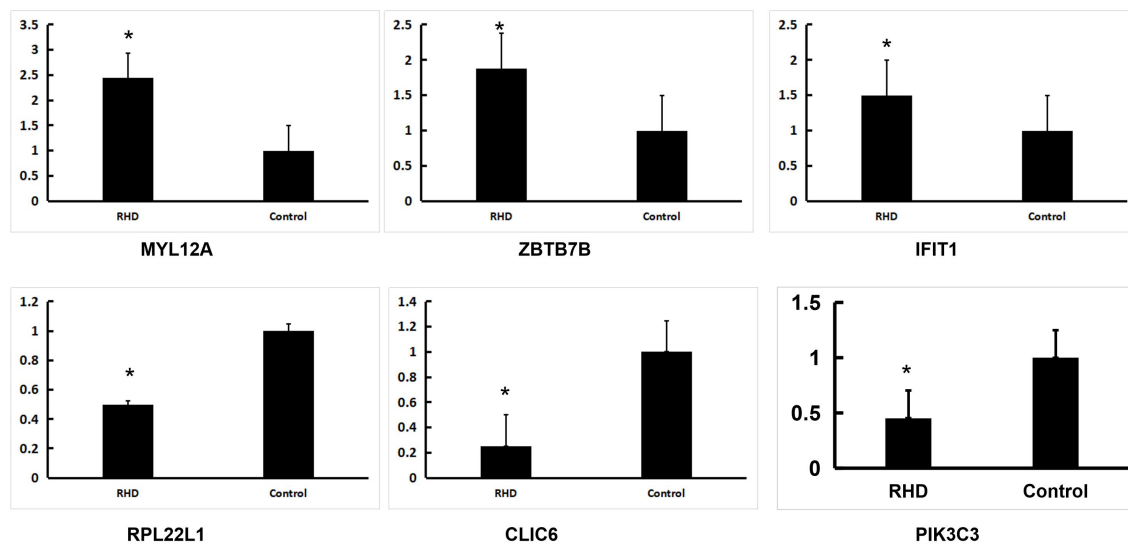

**Figure S2.** Validation for selected mRNAs by RT-PCR. \*  $p < 0.05$ . RHD rheumatic heart disease; C healthy control.

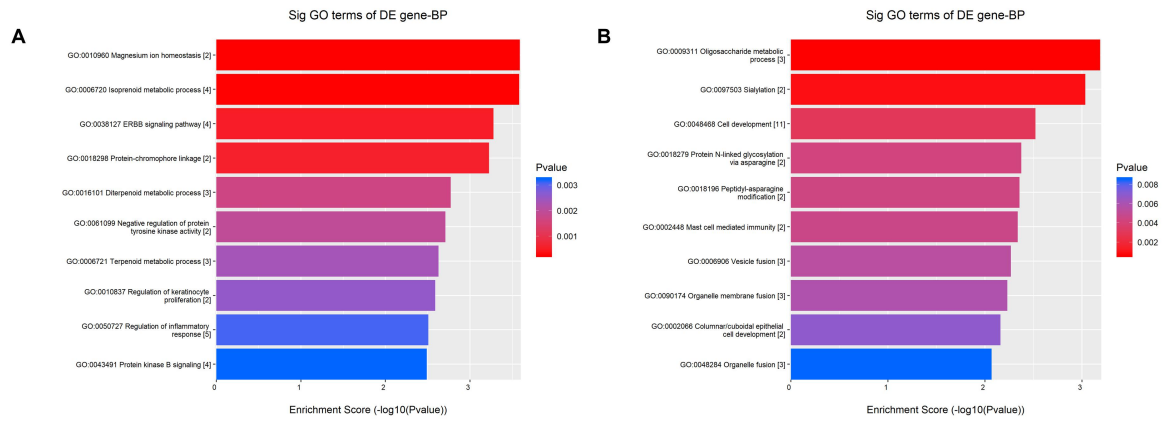

**Figure S3.** Go analysis of the associated nearby genes with differentially expressed lncRNA downregulated (A) or upregulated (B).

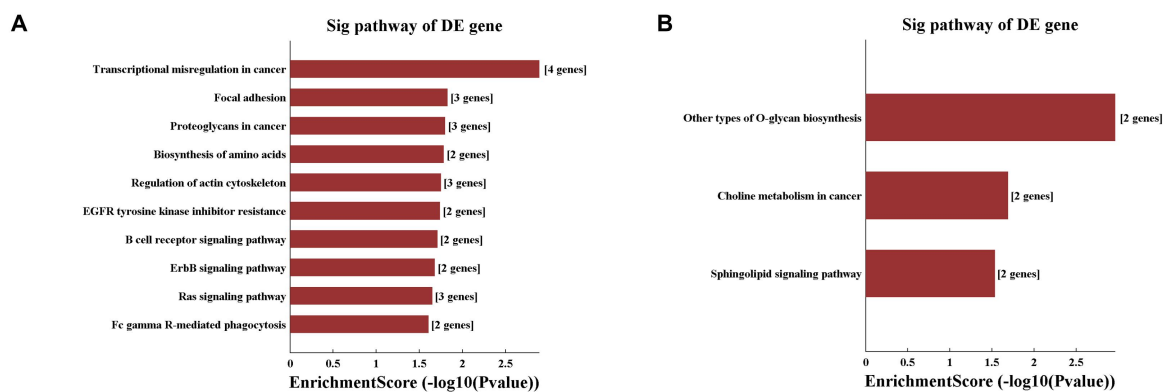

**Figure S4.** Pathway analysis of the associated nearby genes with differentially expressed lncRNA downregulated (A) or upregulated (B).
